# Succinylation Links Metabolic Reductions to Amyloid and Tau Pathology

Yun Yang<sup>1,2,3</sup>, Victor Tapias<sup>2</sup>, Diana Acosta<sup>4</sup>, Hui Xu<sup>2,3</sup>, Huanlian Chen<sup>2,3</sup>, Ruchika Bhawal<sup>5</sup>, Elizabeth Anderson<sup>5</sup>, Elena Ivanova<sup>6</sup>, Hening Lin<sup>7,8</sup>, Botir T. Sagdullaev<sup>9,10</sup>, William L. Klein<sup>11</sup>, Kirsten L. Viola<sup>11</sup>, Sam Gandy<sup>12</sup>, Vahram Haroutunian<sup>13,14</sup>, M. Flint Beal<sup>2</sup>, David Eliezer<sup>4</sup>, Sheng Zhang<sup>5</sup>, Gary E. Gibson<sup>2,3</sup>.

## List of Author Contact Information

### Yun Yang

1. Integrated Medicine Research Center for Neurological Rehabilitation, College of Medicine, Jiaying University, Jiaying, 314001, China

2. Feil Family Brain and Mind Research Institute, Weill Cornell Medicine, New York, NY 10065, USA

3. Burke Neurological Institute, White Plains, NY 10605, USA

[zjxuyang@mail.zjxu.edu.cn](mailto:zjxuyang@mail.zjxu.edu.cn); [yay2007@med.cornell.edu](mailto:yay2007@med.cornell.edu)

### Victor Tapias

2. Feil Family Brain and Mind Research Institute, Weill Cornell Medicine, New York, NY 10065, USA

[vit2013@med.cornell.edu](mailto:vit2013@med.cornell.edu)

### Diana Acosta

4. Department of Biochemistry, Weill Cornell Medicine, New York, NY 10065, USA

[dia2018@med.cornell.edu](mailto:dia2018@med.cornell.edu)

### Hui Xu

2. Feil Family Brain and Mind Research Institute, Weill Cornell Medicine, New York, NY 10065, USA

3. Burke Neurological Institute, White Plains, NY 10605, USA

[xuh2003@med.cornell.edu](mailto:xuh2003@med.cornell.edu)

### Huanlian Chen

2. Feil Family Brain and Mind Research Institute, Weill Cornell Medicine, New York, NY 10065, USA

3. Burke Neurological Institute, White Plains, NY 10605, USA

[huc2006@med.cornell.edu](mailto:huc2006@med.cornell.edu)

### Ruchika Bhawal

5. Proteomics Facility, Institute of Biotechnology, Cornell University, Ithaca, NY 14853, USA

35 rb822@cornell.edu

36

37 **Elizabeth Anderson**

38 5. Proteomics Facility, Institute of Biotechnology, Cornell University, Ithaca, NY 14853, USA

39 eta23@cornell.edu

40

41 **Elena Ivanova**

42 6. Imaging Core, Burke Neurological Institute, White Plains, NY 10605, USA

43 eli3001@med.cornell.edu

44

45 **Hening Lin**

46 7. Department of Chemistry and Chemical Biology, Cornell University, Ithaca, NY 14853, USA

47 8. Howard Hughes Medical Institute, Department of Chemistry and Chemical Biology, Cornell

48 University, Ithaca, NY 14853, USA.

49 hl379@cornell.edu.

50

51 **Botir T. Sagdullaev**

52 9. Ophthalmology and Neuroscience, Weill Cornell Medicine, New York, NY 10065, USA

53 10. Laboratory for Visual Plasticity and Repair, Burke Neurological Institute, White Plains, NY 10605,

54 USA

55 bos2005@med.cornell.edu

56

57 **William L. Klein**

58 11. Department of Neurobiology, Northwestern University, Evanston, IL 60208, USA

59 wklein@northwestern.edu

60

61 **Kirsten L. Viola**

62 11. Department of Neurobiology, Northwestern University, Evanston, IL 60208, USA

63 k-viola@northwestern.edu

64

65 **Sam Gandy**

66 12. Departments of Neurology and Psychiatry, Icahn School of Medicine at Mount Sinai, New York, NY

67 10029, USA

68 samuel.gandy@mssm.edu

69

70 **Vahram Haroutunian**

71 13. The Alzheimer's Disease Research Center, NIH Neurobiobank and JJ Peters VA Medical Center

72 MIRECC

73 14. Icahn School of Medicine at Mount Sinai, One Gustave L. Levy Place, New York, NY 10029, USA

74 vahram.haroutunian@mssm.edu

75

76 **M. Flint Beal**

77 2. Feil Family Brain and Mind Research Institute, Weill Cornell Medicine, New York, NY 10065, USA

78 fbeal@med.cornell.edu

79

80 **David Eliezer**

81 4. Department of Biochemistry, Weill Cornell Medicine, New York, NY 10065, USA

82 dae2005@med.cornell.edu

83

84 **Sheng Zhang**

85 5. Proteomics Facility, Institute of Biotechnology, Cornell University, Ithaca, NY 14853, USA

86 sz14@cornell.edu

87

88 **Gary E. Gibson**

89 2. Feil Family Brain and Mind Research Institute, Weill Cornell Medicine, New York, NY 10065, USA

90 3. Burke Neurological Institute, White Plains, NY 10605, USA

91 ggibson@med.cornell.edu

92

93

**Author Contributions**

94 Y.Y. and G.G. conceived the research program and designed the experiments. V.H. contributed to the

95 patient consent, collection of samples. V.H., X.H. and E.A. processed the brain samples. R.B. and S.Z.

96 performed nanoLC-MS/MS analysis. Y.Y. performed data analyses. Y.Y. and X.H. performed

97 biochemical experiments. Y.Y., X.H., and H.C. performed the cell experiments. X.H., H.C., E.I. and

98 B.T.S. performed immunofluorescence on the rotenone treated cells and analyzed the data. D.A. and D.E.

99 designed and performed NMR analysis, processed and interpreted the data and prepared figures. V.T. and

100 M.F.B. participated in the design and conceptualization of the animal study, performed the experiments,

101 analyzed the data, and prepared the figures. H.L. participated in the experimental design and write-up.

102 S.G., W.K. and K.V. provided antibodies and contributed to the design. Y.Y. and G.G. wrote and edited

103 the manuscript. All authors discussed the results, and Y.Y., G.G., S.Z., D.E., S.G., V.H., V.T., B.T.S,  
104 H.L. and E.I. contributed to the writing. All authors read and approved the manuscript.  
105



106

## Abstract

107 Abnormalities in glucose metabolism and misfolded protein deposits composed of the  
108 amyloid- $\beta$  peptide ( $A\beta$ ) and tau are the three most common neuropathological hallmarks of  
109 Alzheimer's disease (AD), but their relationship(s) to the disease process or to each other largely  
110 remains unclear. In this report, the first human brain quantitative lysine succinylome together  
111 with a global proteome analysis from controls and patients reveals that lysine succinylation  
112 contributes to these three key AD-related pathologies. Succinylation, a newly discovered protein  
113 post-translational modification (PTM), of multiple proteins, particularly mitochondrial proteins,  
114 declines with the progression of AD. In contrast, amyloid precursor protein (APP) and tau  
115 consistently exhibit the largest AD-related increases in succinylation, occurring at specific sites  
116 in AD brains but never in controls. Transgenic mouse studies demonstrate that succinylated APP  
117 and succinylated tau are detectable in the hippocampus concurrent with  $A\beta$  assemblies in the  
118 oligomer and insoluble fiber assembly states. Multiple biochemical approaches revealed that  
119 succinylation of APP alters APP processing so as to promote  $A\beta$  accumulation, while  
120 succinylation of tau promotes its aggregation and impairs its microtubule binding ability.  
121 Succinylation, therefore, is the first single PTM that can be added in parallel to multiple  
122 substrates, thereby promoting amyloidosis, tauopathy, and glucose hypometabolism. These data  
123 raise the possibility that, in order to show meaningful clinical benefit, any therapeutic and/or  
124 preventative measures destined for success must have an activity to either prevent or reverse the  
125 molecular pathologies attributable to excess succinylation.

126

127 **Key words:** Succinylation, Amyloid beta, Tau, Alzheimer's disease

128

## 129 **Introduction**

130 Misfolded protein deposits of the amyloid beta peptide (A $\beta$ )<sup>1,2</sup> and the microtubule-  
131 associated protein tau (tau)<sup>3</sup> are central pathological features in Alzheimer's Disease (AD), while  
132 reduced brain glucose metabolism and synaptic density are more highly correlated with the  
133 development of clinical cognitive dysfunction<sup>4</sup>. Preclinical research shows that diminished  
134 glucose metabolism exacerbates learning and memory deficits, concurrent with the accumulation  
135 of A $\beta$  oligomers and plaques<sup>5</sup>, and misfolded, hyperphosphorylated tau<sup>6,7</sup>. However, the  
136 interrelationships between and among these key pathological processes are largely unknown.

137 The decline in brain glucose metabolism in AD correlates with a reduction in the  $\alpha$ -  
138 ketoglutarate dehydrogenase complex (KGDHC)<sup>8</sup>, a key control point in the tricarboxylic acid  
139 (TCA) cycle. In yeast<sup>9</sup> and cultured neurons<sup>10,11</sup>, reduction in KGDHC activity leads to a wide-  
140 spread reduction in regional brain post-translational lysine succinylation, a recently discovered  
141 post-translational modification (PTM). Studies of organisms deficient in NAD<sup>+</sup>-dependent  
142 desuccinylase sirtuin 5 (SIRT5)<sup>12</sup> provide evidence of the regulatory importance of succinylation  
143 in metabolic processes<sup>13-17</sup>. However, the role of succinylation in metabolic pathways of the  
144 human nervous system or in neurodegenerative diseases is unknown. Our study represents the  
145 first to report the human brain succinylome and characterize its changes in AD. The results  
146 suggest that succinylation links the AD-related metabolic deficits to structural, functional and  
147 pathological changes in APP and tau.

148

## 149 **Succinylome and proteome of human brain**

150 Analysis of two cohorts each consisting of brain tissues from five controls and five AD  
151 patients (patient information is provided in **Supplementary Table 1**) was performed in order to

152 maximize our chances of optimizing the precision and reproducibility of the determinations of  
153 the succinylome (**Figure 1a, b**) and the proteome (**Figure 1c, d**). When the two independent  
154 cohorts were taken together, 1,908 succinylated peptides from 314 unique proteins were  
155 identified across a total sample size of 20 brains (**Figure 1b**). The parallel global proteomic  
156 analysis detected 4,678 proteins (**Figure 1d**). Nearly all of the succinylated proteins identified  
157 during the study were found in the global proteome of the same samples (**Figure 1e**).

158 Subcellular localization analysis of the 314 succinylated proteins from 20 human brains  
159 facilitates an understanding of the implications of succinylation for cell function (**Figure 2a** and  
160 **Supplementary Table 2**). Succinylated proteins were one-to-many mapped to multiple  
161 subcellular compartments. Among those, mitochondrial proteins were the most heavily  
162 succinylated (**Figure 2b**). About 73% (229/314) of the succinylated proteins were mitochondrial.  
163 The pyruvate dehydrogenase complex (PDHC) E1 component subunit alpha (PDHA1), which  
164 links glycolysis to the TCA cycle, was succinylated extensively. All eight enzymes of the TCA  
165 cycle in the mitochondrial matrix and their multiple subunits, were also succinylated extensively.  
166 Succinylated proteins were also associated with the cytosol (30%, 95 proteins) and nucleus  
167 (23%, 73 proteins) (**Figure 2b**). The overall distribution resembled that reported for  
168 succinylated proteins in mouse liver<sup>16,17</sup>.

169 The number of succinylation sites per protein varied from 1 to 23 (**Figure 2c** and  
170 **Supplement Table 2**), with 40% (125/314) having one succinylated site, 20% (60/314) having  
171 two, and the remaining 40% (127/314) having three or more. Eighty-nine percent of proteins  
172 with more than two succinylated lysines were mitochondrial. Moreover, the most extensively  
173 succinylated proteins with over ten distinct succinylated sites/peptides were all mitochondrial  
174 proteins, and 61% (14/21) of these are exclusively mitochondrial proteins including isocitrate

175 dehydrogenase (IDH2), fumarate hydratase (FH) and malate dehydrogenase (MDH2) (see  
176 **Supplement Table 2** in red). In general, these succinylated proteins typically appeared in  
177 metabolism-associated processes and were linked to multiple disease pathways in KEGG  
178 enrichment analysis (**Extended Data Figure 1** and **Supplement Table 3**).

179         Since no specific motifs for lysine succinylation in human cells have been reported, a  
180 succinylation motif analysis of all 1908 succinylated peptides using Motif-X<sup>18</sup> was used to assess  
181 whether specific motif sites exist. A total of five conserved motifs were identified (**Figure 2d**). A  
182 survey of these motifs suggested that non-polar, aliphatic residues including alanine, valine and  
183 isoleucine surround the succinylated lysines. Succinylated lysine site analysis revealed a strong  
184 bias for alanine residues, which is consistent with motifs identified in tomato<sup>14</sup>. IceLogo<sup>19</sup> heat  
185 maps assessed the preference of each residue in the position of a 15 amino acid-long sequence  
186 context (**Figure 2e**). Isoleucine was detected downstream of lysine-succinylation sites, while  
187 alanine and lysine, two of the most conserved amino acid residues, were found upstream.  
188 Meanwhile, valine residues occurred upstream and downstream. By contrast, there was only a  
189 very small chance that tryptophan, proline or serine residues occurred in the succinylated  
190 peptides.

191

## 192 **Succinylome and proteome changes in AD brains**

193         Completion of the human brain succinylome and global proteome analyses allowed direct  
194 comparison between brains from controls and AD patients. Of 1,908 succinylated peptides  
195 identified in two independent analyses (n = 5 control brains; n = 5 AD brains), 932 succinylated  
196 peptides were quantifiable (**Figure 1a**). A volcano graph analysis revealed that the succinylation  
197 of 434 unique peptides declined with AD while the abundance of 498 unique succinylated

198 peptides was increased (**Figure 3a** and **Supplement Table 4**). Succinylation of 29 peptides  
199 (from 20 proteins) differed significantly (two-tailed Student's t-test,  $p < 0.05$ ) between AD and  
200 controls (**Figure 3a, b**). Succinylation of ten peptides increased with AD while succinylation of  
201 19 peptides decreased.

202 Proteomic analysis of 20 samples in two cohorts (**Figure 1c**) showed that of the 4,678  
203 identified proteins, 4,442 common proteins were quantifiable in both AD and controls (**Figure**  
204 **1d** and **Extended Data Figure 2a, b**). Comparison of the succinylome with the proteome  
205 demonstrated that the AD-related changes in succinylation of these peptides were only weakly  
206 correlated with -- and therefore unlikely to be due to -- changes in corresponding protein levels  
207 (**Figure 3c**). The proteomic analysis revealed that 81 proteins changed significantly (two-tailed  
208 Student's t-test,  $p < 0.05$  and  $|\log_2FC| > 0.25$ ). Eight proteins decreased in brains from AD  
209 patients, while 73 proteins increased (**Extended Data Figure 2a**).

210 The overwhelming majority (16/19) of the peptides with AD-related decreases in  
211 succinylation were mitochondrial, and more than half of them showed exclusive localization in  
212 mitochondria (**Supplementary Table 5**). A novel association of the ATP5H/KCTD2 locus with  
213 AD has been reported<sup>20</sup>, and ATP-synthase activity declines in AD brains<sup>21</sup>. In line with these  
214 findings, we identified the maximal AD-related decrease (-1.33 in  $\log_2FC$ ) in ATP synthase  
215 subunit d (ATP5H), with two additional peptides from ATP5H down at -0.52 and -0.49 in  
216  $\log_2FC$ . Moreover, two peptides from another subunit, namely ATP synthase subunit b  
217 (ATP5F1), also decreased ( $\log_2FC$  at -0.47- and -0.32) in AD brains. Succinylation of three  
218 lysine residues (Lys<sup>77</sup>, Lys<sup>244</sup> and Lys<sup>344</sup>) of PDHA1 also decreased significantly with AD  
219 (**Figures 3a, 3b**).

220 The largest AD-related increases in succinylation were in non-mitochondrial proteins  
221 (**Figures 3a, 3b**). Succinylation of four peptides from brain cytosolic and/or extracellular  
222 hemoglobin subunits alpha and beta increased by 1.91- (0.978 in log<sub>2</sub>FC) to 2.18-fold (1.127 in  
223 log<sub>2</sub>FC) with AD. Strikingly, two extra-mitochondrial peptides with the largest AD-related  
224 increases in succinylation were from two proteins critical to AD pathology: APP and tau. Both  
225 proteins were highly succinylated at critical sites in nine out of ten AD brain samples, but no  
226 succinylation of APP or tau was detectable in any control brains (**Figures 5, 6**).

227

### 228 **Subcellular responses of succinylation to impaired mitochondrial function.**

229 Subcellular succinylation in response to perturbed mitochondrial function was  
230 determined by compromising mitochondrial function of HEK293T cells by mild inhibition of  
231 complex I (20-minute-treatment) followed by determining the effects on succinylation. Impaired  
232 mitochondrial function diminished general succinylation in whole cell lysates and mitochondrial  
233 fractions (**Figure 4a**), consistent with previous findings in N2a cells<sup>11</sup>. However, mitochondrial  
234 dysfunction increased succinylation of 30-70 kDa proteins in the non-mitochondrial fractions.  
235 We previously demonstrated that mitochondrial dysfunction can alter mitochondrial/cytosolic  
236 protein signaling<sup>22</sup>. Here we extend this line of investigation by showing that mitochondrial  
237 dysfunction resulted in a release of mitochondrial proteins including all subunits of PDHC and  
238 KGDHC (**Figure 4b, c**). This was not due to disruption of the mitochondrial integrity because  
239 cytochrome c oxidase subunit 4 isoform 1 (CoxIV), an integral membrane protein in  
240 mitochondria, did not increase in the cytosol fraction. Confocal microscopy further confirmed  
241 that rotenone caused a redistribution of mitochondrial proteins without mitochondrial lysis, as  
242 mitochondria were clearly outlined by CoxIV immunolabeling. Rotenone treatment increased the

243 amount of the cytosolic E2k component of KGDHC (DLST) outside of mitochondria defined by  
244 CoxIV (**Figure 4d**). Thus, impaired mitochondrial function induced a metabolic disturbance  
245 leading to an increased leakage of mitochondrial proteins into the cytosol, including DLST.  
246 DLST, being a succinyltransferase<sup>10</sup> and a succinyl-CoA generator<sup>23</sup>, increased succinylation in  
247 non-mitochondrial fractions.

248

### 249 **Functional significance of succinylation of APP**

250 AD-associated succinylation of APP occurred at a critical site (K687) in nine of ten  
251 brains from AD patients but not in controls (**Figure 5a, b**), and the following experiments  
252 demonstrated it to be pathologically important. In Tg19959 mice bearing human APP with two  
253 AD-related mutations, the early amyloid pathological changes appeared at 4 months (**Figure 5c**  
254 and **Extended Data Figure 3a**), and amyloid deposits developed by 10 months (**Figure 5d** and  
255 **Extended Data Figure 3b**). Double immunofluorescence staining with antibodies to pan-lysine-  
256 succinylation and to A $\beta$  oligomers (NU-4)<sup>24</sup> or to A $\beta$  plaque ( $\beta$ -Amyloid (D3D2N)) revealed a  
257 very early increase in succinylation that appeared to paralleled oligomer formation and  
258 subsequent plaque formation in the hippocampus. These findings suggest that the APP  
259 succinylation might be involved in A $\beta$  oligomerization and plaque formation throughout the  
260 development of plaque pathology *in vivo*.

261 In subsequent experiments, we tested the relationship between succinylation and APP  
262 processing by the secretase enzymes. K687-L688 is the APP  $\alpha$ -secretase cleavage bond, and a  
263 missense mutation at K687N produces an early onset dementia<sup>25</sup>. Furthermore, global  
264 proteomics showed an increase of  $\beta$ -secretase (BACE1) abundance of 31% in AD brains  
265 compared to controls (**Supplementary Data Table 6**), while no changes occurred for either  $\alpha$ -

266 secretase or the SIRT family (**Extended Data Figure 2c**). Thus, succinylation of APP at K687 in  
267 AD may promote A $\beta$  production by inhibiting  $\alpha$ -secretase cleavage. To test this, synthetic  
268 peptides comprised of residues 6-29 in A $\beta$ <sub>42</sub> (numbering with respect to the N terminus of A $\beta$ <sub>42</sub>),  
269 which span the  $\alpha$ -secretase cleavage site, with or without succinylation at K16 (corresponding to  
270 K678 in APP), were assayed for  $\alpha$ -secretase cleavage susceptibility. Recombinant human  
271 ADAM10 (rhADAM10) cleaved the native (control) peptide (substrate) with 84% efficiency,  
272 whereas no cleavage of its succinylated counterpart was detectable following a 24-hrs incubation  
273 (**Figure 5e**). Measurement of the two fragments that are produced by  $\alpha$ -secretase activity  
274 confirmed a strong inhibition of  $\alpha$ -secretase activity (**Extended data Figure 3c-g**).

275 Residue K16 (K687 in APP) is critical for both aggregation and toxicity of A $\beta$ <sub>42</sub><sup>2,26</sup>. A $\beta$   
276 oligomers are widely regarded as the most toxic and pathogenic form of A $\beta$ <sup>27</sup>. To assess whether  
277 succinylation can directly alter A $\beta$  oligomerization, aggregation of succinylated and non-  
278 succinylated A $\beta$ <sub>42</sub> was determined by anti-A $\beta$  oligomer antibody NU-2<sup>24</sup> and electron  
279 microscopy (EM). After 24 and 48 hrs incubation, succinylation promoted more robust A $\beta$   
280 oligomerization (**Figure 5f**). Moreover, the EM micrographs clearly revealed elevated levels of  
281 oligomeric, protofibrillar, and fibrillar A $\beta$ <sup>28</sup> in the succinylation group at t = 24 or 48 hrs (**Figure**  
282 **5g**). These data revealed that succinylation of K687 of APP was a key molecular pathological  
283 underpinning that promoted A $\beta$  oligomerization. Taken together, the accumulated data strongly  
284 suggest that succinylation of K678 might lead to an early-onset enhanced generation,  
285 oligomerization and plaque biogenesis, consistent with the effects of known genetic disease  
286 mutations at this site<sup>25,29</sup>.

287

288



289 **Functional significance of succinylation of tau**

290 Tau has two important nucleating sequences that initiate the aggregation process: PHF6  
291 (residues 306-311) and PHF6\* (residues 275-280) (**Figure 6a**)<sup>30,31</sup>. PHF6\* is located at the  
292 beginning of the second repeat (R2) and is only present in all four-repeat tau isoforms, while  
293 PHF6 is located at the beginning of the third repeat (R3) and is present in all tau isoforms. Tau  
294 succinylation on K311 within the PHF6 hexapeptide <sup>306</sup>VQIVYK<sup>311</sup> was detected in nine of ten  
295 AD brain samples but was undetectable in all control (**Figure 6b**). Acetylation of K280 of  
296 PHF6\* in tau is a well-characterized<sup>32</sup> modification that affects tau function<sup>3</sup>, and has become a  
297 prognostic factor and a new potential therapeutic target for treating tauopathies. Removal of  
298 residue K311 in PHF6 abrogated fibril formation<sup>33</sup>, but the structural and functional implications  
299 of K311 succinylation are unknown. Thus, exploring the influence of tau succinylation on K311  
300 may be important as we seek to develop a comprehensive understanding of the effects.

301 In order to characterize tau succinylation in a mouse model of tangle formation, we used  
302 immunofluorescence staining to compare the presence or absence of succinylation with that of tau  
303 oligomers (T-22)<sup>34</sup> and phospho-Tau (AT8) in hippocampus from 4-month-old and 10-month-old  
304 wild type and TgP301S mice. No phosphorylated tau and few tau oligomers occurred in wild  
305 type mice (**Figure 6c, d** and **Extended Data Figure 4a, b**), but in 4-month-old TgP301S mice.  
306 Succinylation immunofluorescence signals were increased in parallel with the oligomeric tau T-  
307 22 (green) and Phospho-Tau AT8 (green) in 4-month-old TgP301S mice (**Figure 6c, d** and  
308 **Extended Data Figure 4a, b**). Thus, tau succinylation is associated with tau aggregates in  
309 TgP301S mouse model at an early stage. By contrast, a weak signal for succinylated tau occurred  
310 in 10-month-old TgP301S mice (**Figure 6c, d** and **Extended Data Figure 4a, b**), indicating a

311 desuccinylation process may exist in the final states of tau deposition. This reflected a potential  
312 existence of succinylation-phosphorylation switch as is the case with acetylation<sup>35,36</sup>.

313 The heparin-induced thioflavin S (ThS) tau aggregation assay was used to test the  
314 influence of tau succinylation at K311 on the ability of PHF6 to self-aggregate. PHF6\* and  
315 K280-acetylated PHF6\* (A-PHF6\*) were also used as controls in parallel assays (**Extended**  
316 **Data Figure 4c**). Surprisingly, at peptide concentration of 10  $\mu$ M in the presence of 2.5  $\mu$ M  
317 heparin, neither PHF6\* nor A-PHF6\* fibrillated during an 80-min incubation period. Although  
318 PHF6\* is an initiation site for tau aggregation, its potency is much lower than that of PHF6<sup>37</sup>,  
319 possibly explaining the observed lack of aggregation under these conditions. In contrast, PHF6  
320 and K311-succinylated PHF6 (S-PHF6) fibrillated by 80 min and 20 min, respectively (**Figure**  
321 **6e**). The aggregation of PHF6 was remarkably accelerated by the K311 succinylation. A similar  
322 enhancement of PHF6-induced aggregation occurred even with a mixture containing 90% PHF6  
323 and only 10% S-PHF6, suggesting that succinylated tau can promote aggregation of unmodified  
324 protein (**Figure 6e**). Longer (24-hour incubations) of PHF6, S-PHF6, and a 90%/10% mixture  
325 were visualized by EM (**Figure 6f-h**). All the reactions exhibited fibrils with a typical paired  
326 helical filament appearance. However, the succinylated peptide formed abundant, short and  
327 chaotic filaments, characteristics of brain-derived Alzheimer PHFs<sup>38-40</sup>, while unmodified PHF6  
328 filaments are longer and sparser, morphologies more typical of recombinant tau peptide fibers  
329 (**Figure 6i and 6j**). Thus, both the ThS fluorescence and the EM results support an important role  
330 of succinylation in promoting pathological tau aggregation.

331 To understand the implications of succinylation for tau function, tubulin polymerization  
332 was assayed using the tau K19 peptide, a 99-residue 3-repeat tau microtubule-binding domain  
333 (MBD) fragment (MQ244-E372), and succinylated K19 (**Extended Data Figure 4d-f**). Native

334 tau K19 promoted tubulin assembly as determined by increased light scattering at 350 nm, as  
335 previously reported<sup>3,41</sup>, while succinyl-CoA treated K19 showed a complete suppression of  
336 tubulin assembly activity (**Figure 6k**). These findings suggest that succinylation of tau leads to a  
337 loss of normal tau function in regulating microtubule dynamics.

338 NMR spectroscopy was used to investigate whether succinylation mediated loss of tau  
339 microtubule assembly activity resulted from a loss of tau-tubulin interactions. The binding of the  
340 tau MBD fragment K19, to a construct, composed of two tubulin heterodimers stabilized by a  
341 stathmin-like domain (T2R), was monitored as previously described<sup>42</sup>. In the presence of T2R a  
342 number of NMR HSQC resonances show a reduced intensity compared to corresponding  
343 resonances of matched samples of K19 in the absence of T2R (**Figure 6i**). This decreased  
344 resonance intensity indicates an interaction between the corresponding K19 residue and the much  
345 larger T2R complex. The most highly attenuated resonances (intensity ratios < 0.2) within the  
346 MBD corresponded to residues ranging from positions 308 to 323, located in R2 of the MBD and  
347 included most of the PHF6 sequence. Succinylation of <sup>15</sup>N-labeled K19 (**Extended Data Figure**  
348 **4g-i**) largely abrogated intensity decreases in spectra collected in the presence vs. absence T2R,  
349 with increased intensity ratios compared to unmodified K19 across all residues (**Figure 6m**).  
350 This indicates that succinylation of K19 weakens the interaction with the T2R tubulin tetramer.

351 To establish whether succinylation of K311 was sufficient to specifically decrease tau-  
352 tubulin interactions, <sup>1</sup>H saturation transfer difference (STD) NMR was employed to analyze the  
353 tubulin interactions of a tau peptide (residues 296-321) previously shown to comprise a high  
354 affinity microtubule binding motif within tau<sup>43-45</sup>. STD signals were observed for unmodified tau  
355 peptide (296-321) in the presence of tubulin (**Figure 6n**), as previously reported<sup>45</sup>, indicative of  
356 binding. Succinylation of residue K311 within the tau peptide (296-321) resulted in a dramatic loss

357 of STD signals (**Figure 6o**), indicating that K311 succinylation results in a significantly decreased  
358 binding affinity of this microtubule-binding tau peptide for tubulin. The recently reported structure  
359 of tau bound to microtubules shows that K280, the R2 equivalent of K311, lies along the  
360 microtubule surface<sup>44</sup>. K280/K311 have their positively charged amino group in close proximity  
361 to residue E415 of  $\alpha$ -tubulin (**Extended data Figure 4j**). Therefore, it is possible that  
362 succinylation at K311 might result in an electrostatic clash between the negatively charged  
363 succinyl group and E415 residue. A decreased affinity of K311-succinylated tau for tubulin and/or  
364 microtubules could contribute to the progression of tau pathology in AD.

365

## 366 **Discussion**

367 Our study provides a system level view of the human brain succinylome in metabolic  
368 process, particularly in mitochondria, and reveals the dramatic alterations of succinylation in  
369 AD. Notably, these results demonstrate for the first time that succinylation is the key link  
370 between the signature metabolic reductions and amyloid plaques and neurofibrillary tangles in  
371 AD. The current results reveal that varied in protein succinylation, as a molecular signal,  
372 correlates with altered cerebral metabolic function in AD as the disease progresses. Other PTMs,  
373 such as ubiquitination, acetylation and phosphorylation, recently shown to affect amyloid  
374 degradation<sup>46,47</sup> and tau dysfunction<sup>35,46-48</sup>, contribute to amyloidopathy and tauopathy in disease.  
375 Our findings open new areas of research on the cross talk involvon aggregation, succinylation,  
376 acetylation, malonylation, ubiquitination and phosphorylation, which are also directly linked to  
377 metabolism and as well as implicated in amyloid and tau pathology.

378 The mechanisms and control of both non-enzymatic succinylation and enzymatic  
379 succinylation by cellular succinyltransferases and desuccinylases are largely unknown<sup>49</sup>. The

380 data in this paper clearly demonstrate that impairing mitochondrial function decreases  
381 mitochondrial succinylation and promotes succinylation of specific non-mitochondrial proteins  
382 by altering the distribution of succinyltransferases from the mitochondria to cytosol. Precedent  
383 for this concept is provided by results showing that the movement of the DLST subunit of  
384 KGDHC to the nucleus increases histone succinylation<sup>23</sup>. Rotenone causes translocation of  
385 PDHC from mitochondria to other cellular compartments<sup>50</sup>. The decline in succinylation of  
386 mitochondrial proteins suggests that activation of descuccinylases (e.g., SIRTUINS) or general  
387 increases in NAD, a popular strategy, should be reconsidered. APP and tau were only  
388 succinylated in brains from AD patients. Thus, the modification of metabolism in disease may  
389 lead to critical succinyl-mediated modifications of extra-mitochondrial proteins including APP  
390 and tau. Preventing APP and tau succinylation and/or increasing mitochondrial succinylation  
391 may provide novel therapeutic targets for the prevention and/or treatment of AD.

392 Overall, these data represent the first report of the human brain succinylome and its  
393 implications, both that for mitochondrial function as well as another for molecular pathogenesis,  
394 both amyloidosis and tauopathy. The results provide a rich resource for functional analyses of  
395 lysine succinylation, and facilitate the dissection of metabolic networks in AD. The current  
396 studies lay the foundation for future investigation into the crosstalk between different PTMs,  
397 including acetylation, phosphorylation, and succinylation associated with AD pathology. The  
398 discovery that succinylation links mitochondrial dysfunction to amyloidosis and tauopathy may  
399 provide new molecular diagnostics as well as potential targets for therapies. Since aggregates of  
400 both succinylated A $\beta$  and succinylated tauopathy are closely associated with  $\beta$ -helix dysfunction,  
401 future studies may reveal additional succinylated proteins that are associated with AD or other  
402 neurodegenerative diseases.

403

404 **Acknowledgements**

405 The studies were supported by: NIH-NIA grants P01AG014930 (G.E.G., M.F.B.) and  
406 R37AG019391 (D.E.); R01-EY026576 and R01-EY029796 (B.T.S.); NIH SIG 1S10 OD017992-  
407 01 (S.Z.); HHSN271201300031C (V.H.); AG18877 & AG22547 (W.L.K.); Burke Neurological  
408 Institute, Weill Cornell Medicine; Integrated Medicine Research Center for Neurological  
409 Rehabilitation, College of Medicine, Jiaying University, Jiaying, China (Dean J. Chen).  
410 We thank L. Cohen-Gould, MS, director of the Microscopy and Image Analysis Core Facility  
411 (Weill Cornell Medicine) for the EM and C. Bracken, PhD, director of the NMR Facility (Weill  
412 Cornell Medicine) for help with NMR experiments.  
413 We thank E. Ivanova and Structural and Functional Imaging Core at the Burke Neurological  
414 Institute for the technical assistance.  
415 We are grateful to the NIH Neurobiobank for providing the carefully characterized human  
416 brains.  
417 We thank Dr. R. Kaye (Department Neurology, University of Texas Medical Branch) for kindly  
418 providing the T22 antibody for tau aggregates.  
419

420 **References:**

- 421 1. Usui, K., *et al.* Site-specific modification of Alzheimer's peptides by cholesterol oxidation  
422 products enhances aggregation energetics and neurotoxicity. *Proceedings of the National*  
423 *Academy of Sciences* **106**, 18563-18568 (2009).
- 424 2. Tjernberg, L.O., *et al.* Arrest of  $\beta$ -Amyloid Fibril Formation by a Pentapeptide Ligand. *Journal of*  
425 *Biological Chemistry* **271**, 8545-8548 (1996).
- 426 3. Cohen, T.J., *et al.* The acetylation of tau inhibits its function and promotes pathological tau  
427 aggregation. *Nature communications* **2**, 252 (2011).
- 428 4. Gordon, B.A., *et al.* Spatial patterns of neuroimaging biomarker change in individuals from  
429 families with autosomal dominant Alzheimer's disease: a longitudinal study. *The Lancet*  
430 *Neurology* **17**, 241-250 (2018).
- 431 5. Dumont, M., *et al.* Mitochondrial dihydrolipoyl succinyltransferase deficiency accelerates  
432 amyloid pathology and memory deficit in a transgenic mouse model of amyloid deposition. *Free*  
433 *Radical Biology and Medicine* **47**, 1019-1027 (2009).
- 434 6. Blass, J.P., Baker, A.C., Ko, L. & Black, R.S. Induction of alzheimer antigens by an uncoupler of  
435 oxidative phosphorylation. *Archives of Neurology* **47**, 864-869 (1990).
- 436 7. Cheng, B. & Mattson, M.P. Glucose deprivation elicits neurofibrillary tangle-like antigenic  
437 changes in hippocampal neurons: Prevention by NGF and bFGF. *Experimental Neurology* **117**,  
438 114-123 (1992).
- 439 8. Mastrogriacomo, F., Bergeron, C. & Kish, S.J. Brain  $\alpha$ -Ketoglutarate Dehydrogenase Complex  
440 Activity in Alzheimer's Disease. *Journal of Neurochemistry* **61**, 2007-2014 (1993).
- 441 9. Weinert, Brian T., *et al.* Lysine Succinylation Is a Frequently Occurring Modification in  
442 Prokaryotes and Eukaryotes and Extensively Overlaps with Acetylation. *Cell Reports* **4**, 842-851  
443 (2013).
- 444 10. Gibson, G.E., *et al.* Alpha - ketoglutarate dehydrogenase complex - dependent succinylation of  
445 proteins in neurons and neuronal cell lines. *Journal of neurochemistry* **134**, 86-96 (2015).
- 446 11. Chen, H., *et al.* Mild metabolic perturbations alter succinylation of mitochondrial proteins.  
447 *Journal of Neuroscience Research* **95**, 2244-2252 (2017).
- 448 12. Du, J., *et al.* Sirt5 Is a NAD-Dependent Protein Lysine Demalonylase and Desuccinylase. *Science*  
449 **334**, 806-809 (2011).
- 450 13. Pan, J., Chen, R., Li, C., Li, W. & Ye, Z. Global Analysis of Protein Lysine Succinylation  
451 Profiles and Their Overlap with Lysine Acetylation in the Marine Bacterium *Vibrio*  
452 *parahemolyticus*. *Journal of Proteome Research* **14**, 4309-4318 (2015).
- 453 14. Jin, W. & Wu, F. Proteome-wide identification of lysine succinylation in the proteins of tomato  
454 (*Solanum lycopersicum*). *PloS one* **11**, e0147586 (2016).
- 455 15. Colak, G., *et al.* Identification of Lysine Succinylation Substrates and the Succinylation  
456 Regulatory Enzyme CobB in *Escherichia coli*. *Molecular & Cellular*  
457 *Proteomics* **12**, 3509-3520 (2013).
- 458 16. Park, J., *et al.* SIRT5-Mediated Lysine Desuccinylation Impacts Diverse Metabolic Pathways.  
459 *Molecular Cell* **50**, 919-930 (2013).
- 460 17. Rardin, Matthew J., *et al.* SIRT5 Regulates the Mitochondrial Lysine Succinylome and Metabolic  
461 Networks. *Cell Metabolism* **18**, 920-933 (2013).
- 462 18. F., C.M. & Daniel, S. Biological Sequence Motif Discovery Using motif-x. *Current Protocols in*  
463 *Bioinformatics* **35**, 13.15.11-13.15.24 (2011).
- 464 19. Colaert, N., Helsens, K., Martens, L., Vandekerckhove, J. & Gevaert, K. Improved visualization  
465 of protein consensus sequences by iceLogo. *Nature methods* **6**, 786 (2009).
- 466 20. Boada, M., *et al.* ATP5H/KCTD2 locus is associated with Alzheimer's disease risk. *Molecular*  
467 *Psychiatry* **19**, 682 (2013).



- 468 21. Terni, B., Boada, J., Portero-Otin, M., Pamplona, R. & Ferrer, I. Mitochondrial ATP-Synthase in  
469 the Entorhinal Cortex Is a Target of Oxidative Stress at Stages I/II of Alzheimer's Disease  
470 Pathology. *Brain Pathology* **20**, 222-233 (2010).
- 471 22. Banerjee, K., *et al.* Mild mitochondrial metabolic deficits by  $\alpha$ -ketoglutarate dehydrogenase  
472 inhibition cause prominent changes in intracellular autophagic signaling: Potential role in the  
473 pathobiology of Alzheimer's disease. *Neurochemistry International* **96**, 32-45 (2016).
- 474 23. Wang, Y., *et al.* KAT2A coupled with the alpha-KGDH complex acts as a histone H3  
475 succinyltransferase. *Nature* **552**, 273-277 (2017).
- 476 24. Lambert, M.P., *et al.* Monoclonal antibodies that target pathological assemblies of A $\beta$ . *J*  
477 *Neurochem* **100**, 23-35 (2007).
- 478 25. Kaden, D., *et al.* Novel APP/A $\beta$  mutation K16N produces highly toxic heteromeric A $\beta$   
479 oligomers. *EMBO Molecular Medicine* **4**, 647-659 (2012).
- 480 26. Sinha, S., Lopes, D.H.J. & Bitan, G. A Key Role for Lysine Residues in Amyloid  $\beta$ -Protein  
481 Folding, Assembly, and Toxicity. *ACS Chemical Neuroscience* **3**, 473-481 (2012).
- 482 27. Cline, E.N., Bicca, M.A., Viola, K.L. & Klein, W.L. The Amyloid-beta Oligomer Hypothesis:  
483 Beginning of the Third Decade. *Journal of Alzheimer's disease : JAD* **64**, S567-s610 (2018).
- 484 28. Friedman, R. Aggregation of amyloids in a cellular context: modelling and experiment.  
485 *Biochemical Journal* **438**, 415-426 (2011).
- 486 29. Suh, J., *et al.* ADAM10 Missense Mutations Potentiate  $\beta$ -Amyloid Accumulation by Impairing  
487 Prodomain Chaperone Function. *Neuron* **80**, 385-401 (2013).
- 488 30. von Bergen, M., *et al.* Assembly of  $\tau$  protein into Alzheimer paired helical filaments depends on a  
489 local sequence motif (306VQIVYK311) forming  $\beta$  structure. *Proceedings of the National*  
490 *Academy of Sciences* **97**, 5129-5134 (2000).
- 491 31. Goux, W.J., *et al.* The formation of straight and twisted filaments from short tau peptides.  
492 *Journal of Biological Chemistry* **279**, 26868-26875 (2004).
- 493 32. Min, S.-W., *et al.* Acetylation of Tau Inhibits Its Degradation and Contributes to Tauopathy.  
494 *Neuron* **67**, 953-966 (2010).
- 495 33. Li, W. & Lee, V.M.-Y. Characterization of two VQIXXK motifs for tau fibrillization in vitro.  
496 *Biochemistry* **45**, 15692-15701 (2006).
- 497 34. Lasagna-Reeves, C.A., *et al.* Identification of oligomers at early stages of tau aggregation in  
498 Alzheimer's disease. *FASEB journal : official publication of the Federation of American Societies*  
499 *for Experimental Biology* **26**, 1946-1959 (2012).
- 500 35. Carlomagno, Y., *et al.* An acetylation-phosphorylation switch that regulates tau aggregation  
501 propensity and function. *The Journal of biological chemistry* **292**, 15277-15286 (2017).
- 502 36. Trzeciakiewicz, H., *et al.* A Dual Pathogenic Mechanism Links Tau Acetylation to Sporadic  
503 Tauopathy. *Scientific reports* **7**, 44102 (2017).
- 504 37. Li, W. & Lee, V.M.Y. Characterization of Two VQIXXK Motifs for Tau Fibrillization in Vitro.  
505 *Biochemistry* **45**, 15692-15701 (2006).
- 506 38. von Bergen, M., *et al.* The Core of Tau-Paired Helical Filaments Studied by Scanning  
507 Transmission Electron Microscopy and Limited Proteolysis. *Biochemistry* **45**, 6446-6457 (2006).
- 508 39. Fitzpatrick, A.W., *et al.* Cryo-EM structures of tau filaments from Alzheimer's disease. *Nature*  
509 **547**, 185 (2017).
- 510 40. Barghorn, S., Davies, P. & Mandelkow, E. Tau Paired Helical Filaments from Alzheimer's  
511 Disease Brain and Assembled in Vitro Are Based on  $\beta$ -Structure in the Core Domain.  
512 *Biochemistry* **43**, 1694-1703 (2004).
- 513 41. Lu, P.-J., Wulf, G., Zhou, X.Z., Davies, P. & Lu, K.P. The prolyl isomerase Pin1 restores the  
514 function of Alzheimer-associated phosphorylated tau protein. *Nature* **399**, 784 (1999).
- 515 42. Gigant, B., *et al.* Mechanism of Tau-Promoted Microtubule Assembly As Probed by NMR  
516 Spectroscopy. *Journal of the American Chemical Society* **136**, 12615-12623 (2014).
- 517 43. Kadavath, H., *et al.* Tau stabilizes microtubules by binding at the interface between tubulin  
518 heterodimers. *Proc Natl Acad Sci U S A* **112**, 7501-7506 (2015).



- 519 44. Kellogg, E.H., *et al.* Near-atomic model of microtubule-tau interactions. *Science* **360**, 1242-1246  
520 (2018).
- 521 45. Kadavath, H., *et al.* Tau stabilizes microtubules by binding at the interface between tubulin  
522 heterodimers. *Proceedings of the National Academy of Sciences* **112**, 7501-7506 (2015).
- 523 46. Hong, L., Huang, H.C. & Jiang, Z.F. Relationship between amyloid-beta and the ubiquitin-  
524 proteasome system in Alzheimer's disease. *Neurol Res* **36**, 276-282 (2014).
- 525 47. Bellia, F., *et al.* Ubiquitin binds the amyloid  $\beta$  peptide and interferes with its clearance pathways.  
526 *Chemical science* **10**, 2732-2742 (2019).
- 527 48. Min, S.-W., *et al.* Critical role of acetylation in tau-mediated neurodegeneration and cognitive  
528 deficits. *Nature Medicine* **21**, 1154 (2015).
- 529 49. Yang, Y. & Gibson, G.E.  
530 Succinylation Links Metabolism to Protein Functions. *Neurochemical Research* **in press**(2019).
- 531 50. Sutendra, G., *et al.* A Nuclear Pyruvate Dehydrogenase Complex Is Important for the Generation  
532 of Acetyl-CoA and Histone Acetylation. *Cell* **158**, 84-97 (2014).
- 533

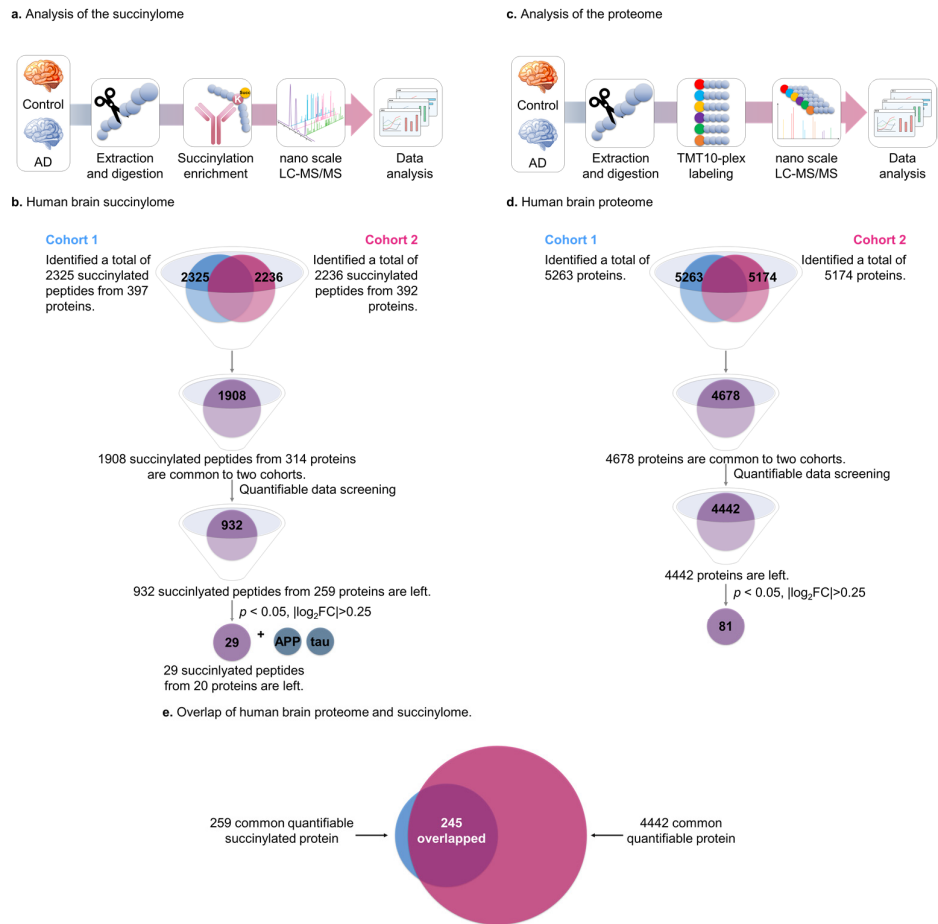

1

2 **Figure 1.** Global analysis of protein lysine succinylation and proteomic profiles in human brains.

3 **a.** A schematic diagram of the workflow for investigation of human brain lysine succinylome by  
4 label-free quantitation (See methods section).

5 **b.** After quantitative data screening and mining, the combined results from 20 brain samples in  
6 two batches revealed 932 common succinylated peptides quantified from 259 proteins  
7 (**Supplementary Table 4**).

8 **c.** A schematic diagram of the workflow for quantitative proteomics of human brain by Tandem  
9 mass tags (TMT) labeling analysis (See methods section).

10 **d.** After quantitative data screening and mining, the combined results from 20 brain samples in  
11 two batches revealed 4,442 common proteins in both AD and controls (**Supplementary Table 6**).

12 Eighty-one proteins showed significant alterations between samples patients with AD and  
13 controls.

14 **e.** The overlap between succinylomes and proteomes. Nearly all of the succinylated proteins were  
15 also identified in its global proteomic analysis.

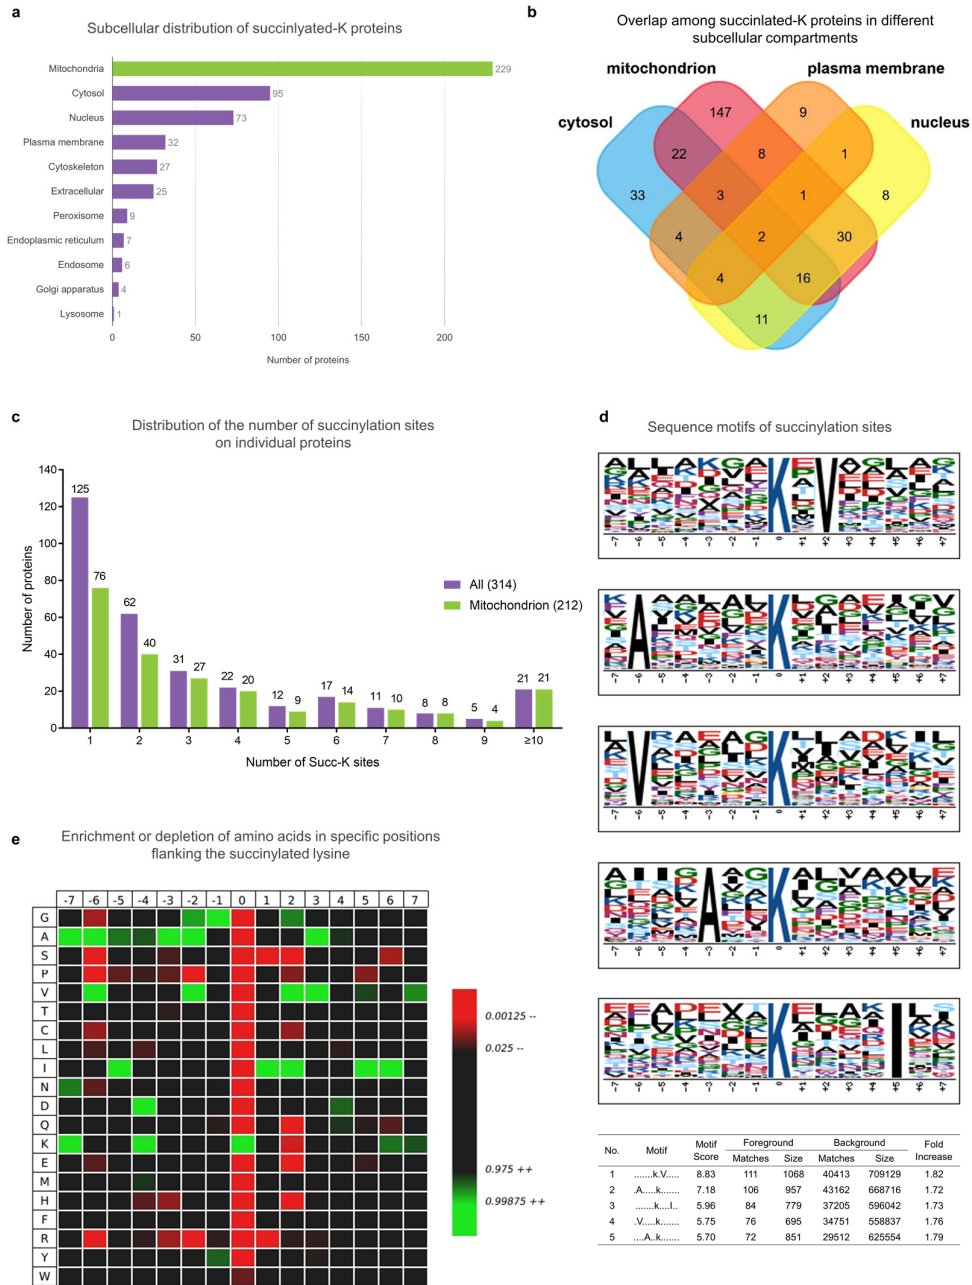

16

17 **Figure 2.** Subcellular distribution of lysine succinylation proteins in human brains.

18 **a.** Subcellular distribution of succinylated-K proteins identified by Cytoscape and stringAPP

19 software. The majority of succinylated-K proteins are mitochondrial.

20 **b.** Overlap of succinylated-K proteins located in the mitochondrion, nucleus, cytosol and plasma

21 membrane. The details of the subcellular distribution of individual proteins are shown in

22 **Supplementary Table 2.**

23 **c.** The extent of succinylation of individual proteins and their enrichment in mitochondria.  
24 Distribution of the number of succinylation sites per protein in all of the succinylated proteins  
25 (purple bars) or succinylated mitochondrial proteins (green bars) as classified by Cytoscape and  
26 stringAPP.

27 **d.** The succinylation sites were analyzed for seven amino acids up- and down-stream of the lysine  
28 residue using Motif-X. The height of each letter corresponds to the frequency of that amino acid  
29 residue in that position. The central blue K refers to the succinylated lysine.

30 **e.** Heat map of the 15 amino acid compositions of the succinylated site showing the frequency of  
31 the different amino acids in specific positions flanking the succinylated lysine. The different colors  
32 of blocks represent the preference of each residue in the position of a 15 amino acid-long sequence  
33 context (green indicates greater possibility, while red refers to less possibility).  
34

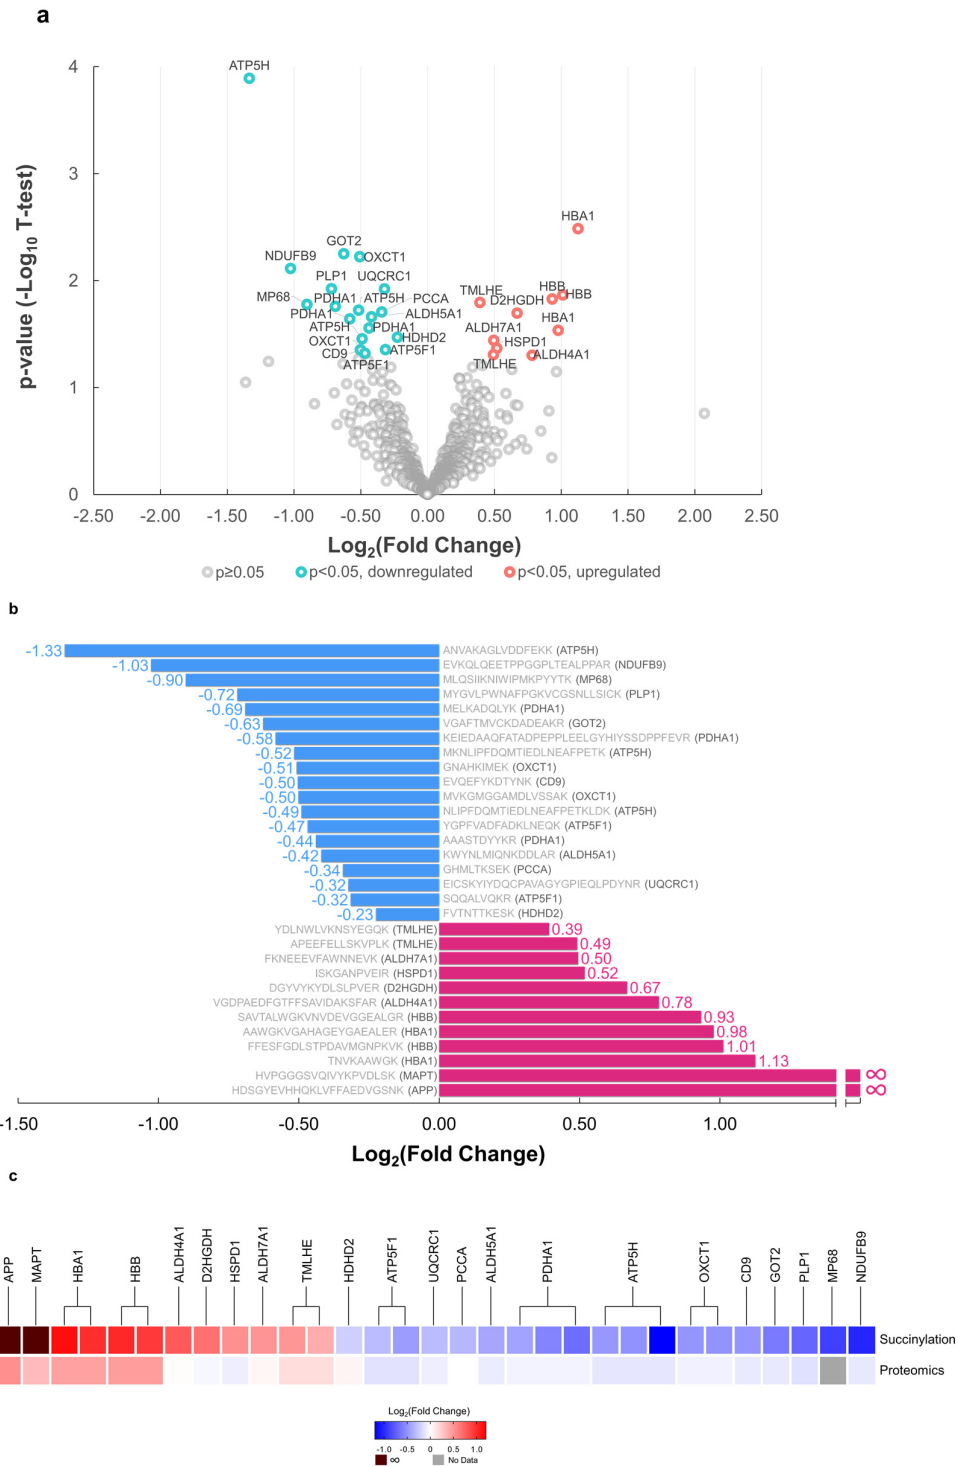

35

36 **Figure 3.** Comparison of the succinylome of brains from ten controls and ten patients with AD

37 reveal many specific differences ( $p < 0.05$ , two-sided Student's t-test).

38 **a.** Volcano plot of 932 brain protein peptide succinylation in controls and AD patients. The signal

39 detection result shows the magnitude ( $\log_2$ Fold Change, x-axis) and significance ( $-\log_{10} p$ -value,

40 y-axis) for brain succinylation changes associated with AD. Each spot represents a specific  
41 succinylated peptide. Green symbols to the left of zero indicate succinylated peptides that are  
42 decreased significantly while red symbols to the right of zero indicate succinylated peptides that  
43 are upregulated significantly in AD brains ( $p < 0.05$ , two-sided Student's t-test).

44 **b.** Peptides with significant differences in succinylation between control and AD brains. Decreases  
45 (blue bars) or increases (red bars) from the control succinylome are depicted as relative fold  
46 change. The sequence of the peptide and the name of the gene to which the peptides belong is  
47 noted for each bar.

48 **c.** Comparison of the AD-related changes in global proteome and succinylome. The succinylated  
49 peptides from the succinylome were clustered based on their proteins. For each protein, its relative  
50 fold change in succinylome and global proteome of AD cases versus controls is shown.

51

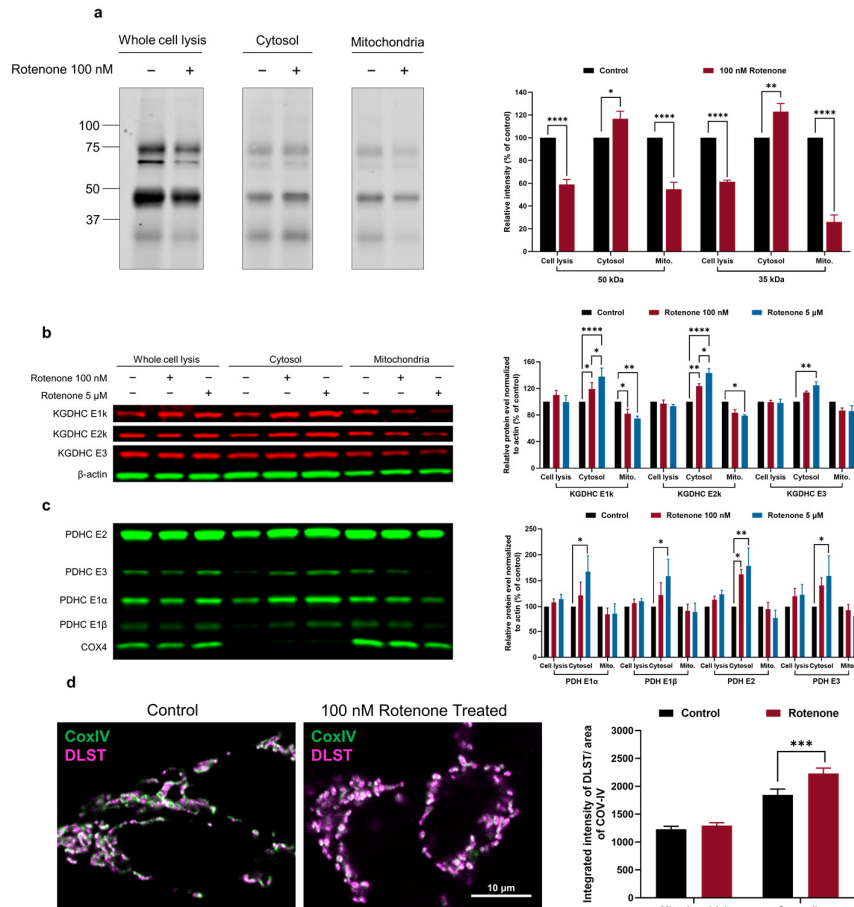

52

53 **Figure 4.** Impairing mitochondrial function altered succinylation and protein distribution in the  
 54 whole cell as well as in the mitochondria and non-mitochondrial fractions.

55 **a.** The effects of rotenone (100 nM/20 min) on succinylation in HEK293T cells. After separation,  
 56 mitochondrial and non-mitochondrial fractions were immune-precipitated with anti-succinyllysine  
 57 antibody and separated by SDS-PAGE followed by Western blotting. The data from three different  
 58 replicate experiments were expressed as the mean with error bars from standard error of the mean  
 59 (SEM) (n = 3, \*\*\*\*:  $p < 0.0001$ , \*\*:  $p < 0.01$ , \*:  $p < 0.05$ , two-way ANOVA followed by  
 60 Bonferroni's multiple comparisons test).

61 **b.** The effects of rotenone (100 nM, 5 μM/20 min) on the distribution of KGDHC protein between  
 62 mitochondria and non-mitochondrial fractions. The data from three different replicate experiments  
 63 were expressed as the mean with error bars from SEM (n = 3, \*\*\*\*:  $p < 0.0001$ , \*\*:  $p < 0.01$ , \*:  $p$   
 64 < 0.05, two-way ANOVA followed by Tukey's multiple comparisons test).

65 **c.** The effects of rotenone (100 nM, 5 μM/20 min) on the distribution of PDHC protein between  
 66 mitochondria and non-mitochondrial fractions. The data from three different replicate experiments

67 were expressed as the mean with error bars from SEM ( $n = 3$ , \*\*:  $p < 0.01$ , \*:  $p < 0.05$ , two-way  
68 ANOVA followed by Tukey's multiple comparisons test).

69 **d.** Confocal microscope analysis results of DLST and mitochondrial mass. co-localization in  
70 HEK293T cells in response to the mitochondrial dysfunction. Magenta: DLST; Green: CoxIV;  
71 Error bars represent SEM deviation from the mean ( $n = 98$  fields from 19 dishes, \*\*\*:  $p < 0.001$ ,  
72 Tukey's multiple comparisons test).

73



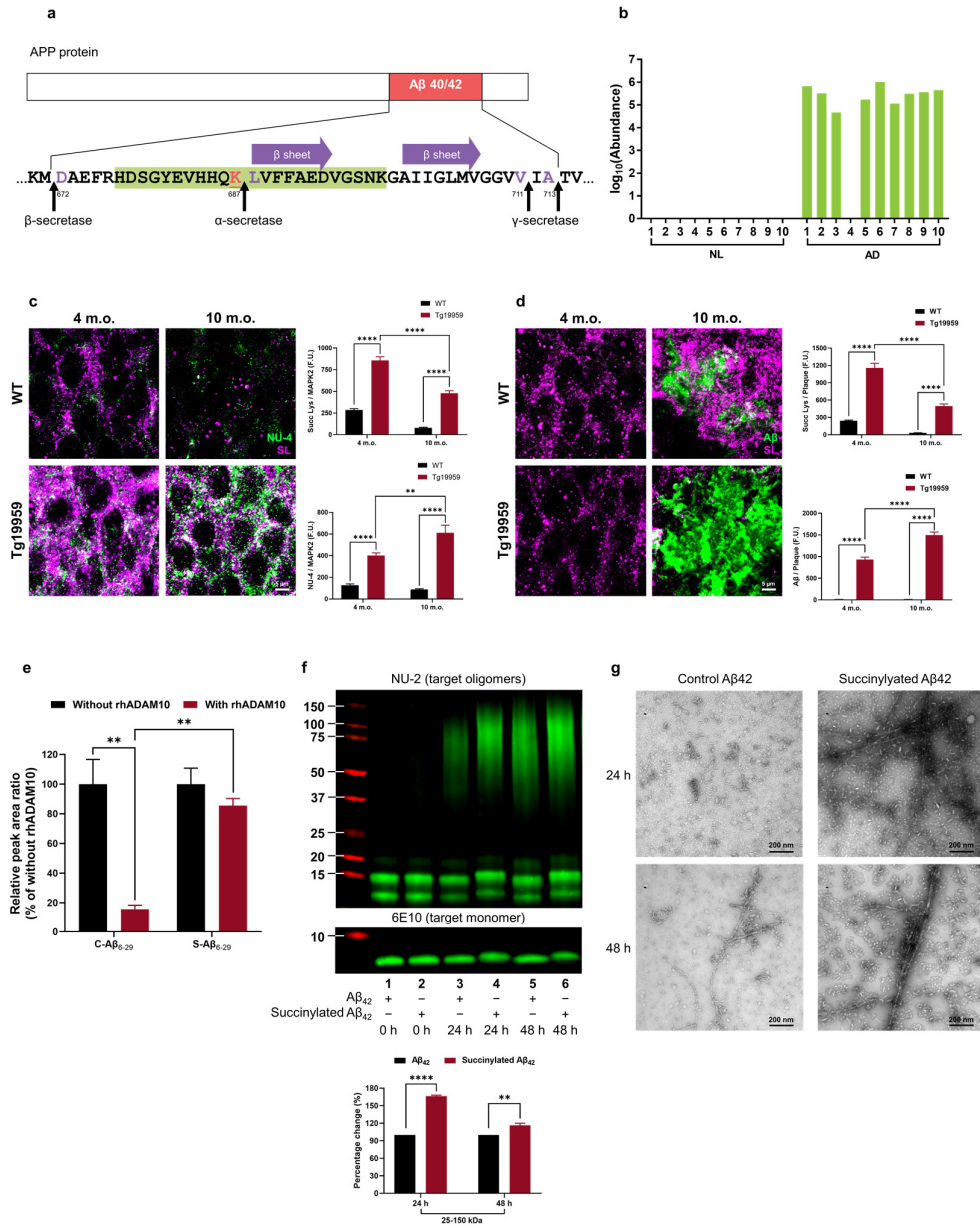

74

75 **Figure 5.** Succinylation occurs uniquely on APP from AD patients, in early stages of plaque  
 76 formation in mouse models and disrupts APP processing.

77 **a.** Location and identity of succinylation K687 near the Aβ region. Residues are numbered  
 78 according to APP770 sequence. Purple amino acids refer to α- or β- or γ- cleavage sites. The red  
 79 underlined lysine refers to succinylated K687. Purple arrow represents the two central strands of  
 80 the β-sheet (Leu688-Asp694 and Ala701-Val707). Green highlights the peptide identified in the  
 81 MS.

82 **b.** Abundance of succinylation K687 found in brains from 10 controls and 10 AD patients. Data  
83 transformed by  $\log_{10}$  (abundance) for normalization purposes and to facilitate presentation.

84 **c.** Confocal microscope analysis of the co-localization of succinylation and amyloid oligomers in  
85 the hippocampal CA1 region sections from 4-month-old and 10-month-old Tg19959 or WT mice.  
86 NU-4 (green) staining A $\beta$  oligomers; pan-succinyl-lysine (magenta). Four mice per group. Data  
87 were expressed as the mean with SEM representative of the average of  $\sim$ 900-1,000 MAP2  
88 neurons or 60 A $\beta$  plaques comprised in 3-4 different hippocampal sections per animal. The  
89 fluorescence intensity of succinyl lysine was normalized to the number of pyramidal neurons  
90 (\*\*\*\*:  $p < 0.0001$ , \*\*:  $p < 0.01$ , two-way ANOVA followed by Tukey's multiple comparisons  
91 test).

92 **d.** Confocal microscope analysis of the co-localization of succinylation and plaque pathology in  
93 the hippocampal CA1 region sections from 4-month-old and 10-month-old Tg19959 or WT mice.  
94 A $\beta$  (green) staining plaque; pan-succinyl-lysine (magenta). Four mice per group. Data were  
95 expressed as the mean with SEM representative of the average of  $\sim$ 900-1,000 MAP2 neurons or  
96 60 A $\beta$  plaques comprised in 3-4 different hippocampal sections per animal. The fluorescence  
97 intensity of succinyl lysine was normalized to the number of pyramidal neurons (\*\*\*\*:  $p <$   
98  $0.0001$ , two-way ANOVA followed by Tukey's multiple comparisons test).

99 **e.** Succinylation blocks  $\alpha$ -cleavage. Peptides were incubated for 24 hrs with or without  
100 rhADAM10. Peak area ratio values were calculated and are shown relative to corresponding  
101 controls without rhADAM10. Each sample was run in triplicate and data were expressed as the  
102 mean with SEM (\*\*:  $p < 0.01$ , two-way ANOVA followed by Bonferroni's multiple comparisons  
103 test; except for one sample from the group of succinylated peptide without rhADAM10 was  
104 damaged).

105 **f.** Western blot analysis of succinylated and control A $\beta_{42}$  from aggregation assay showed that the  
106 succinylation generates more oligomerized A $\beta$  even after a long incubation. The data from two  
107 different replicate experiments were expressed as the mean with error bars from SEM (\*\*\*\*:  $p <$   
108  $0.0001$ , \*\*:  $p < 0.01$ , two-way ANOVA followed by Bonferroni's multiple comparisons test).

109 **g.** Two time points from aggregation assay were analyzed by negative-staining electron  
110 microscopy.  
111

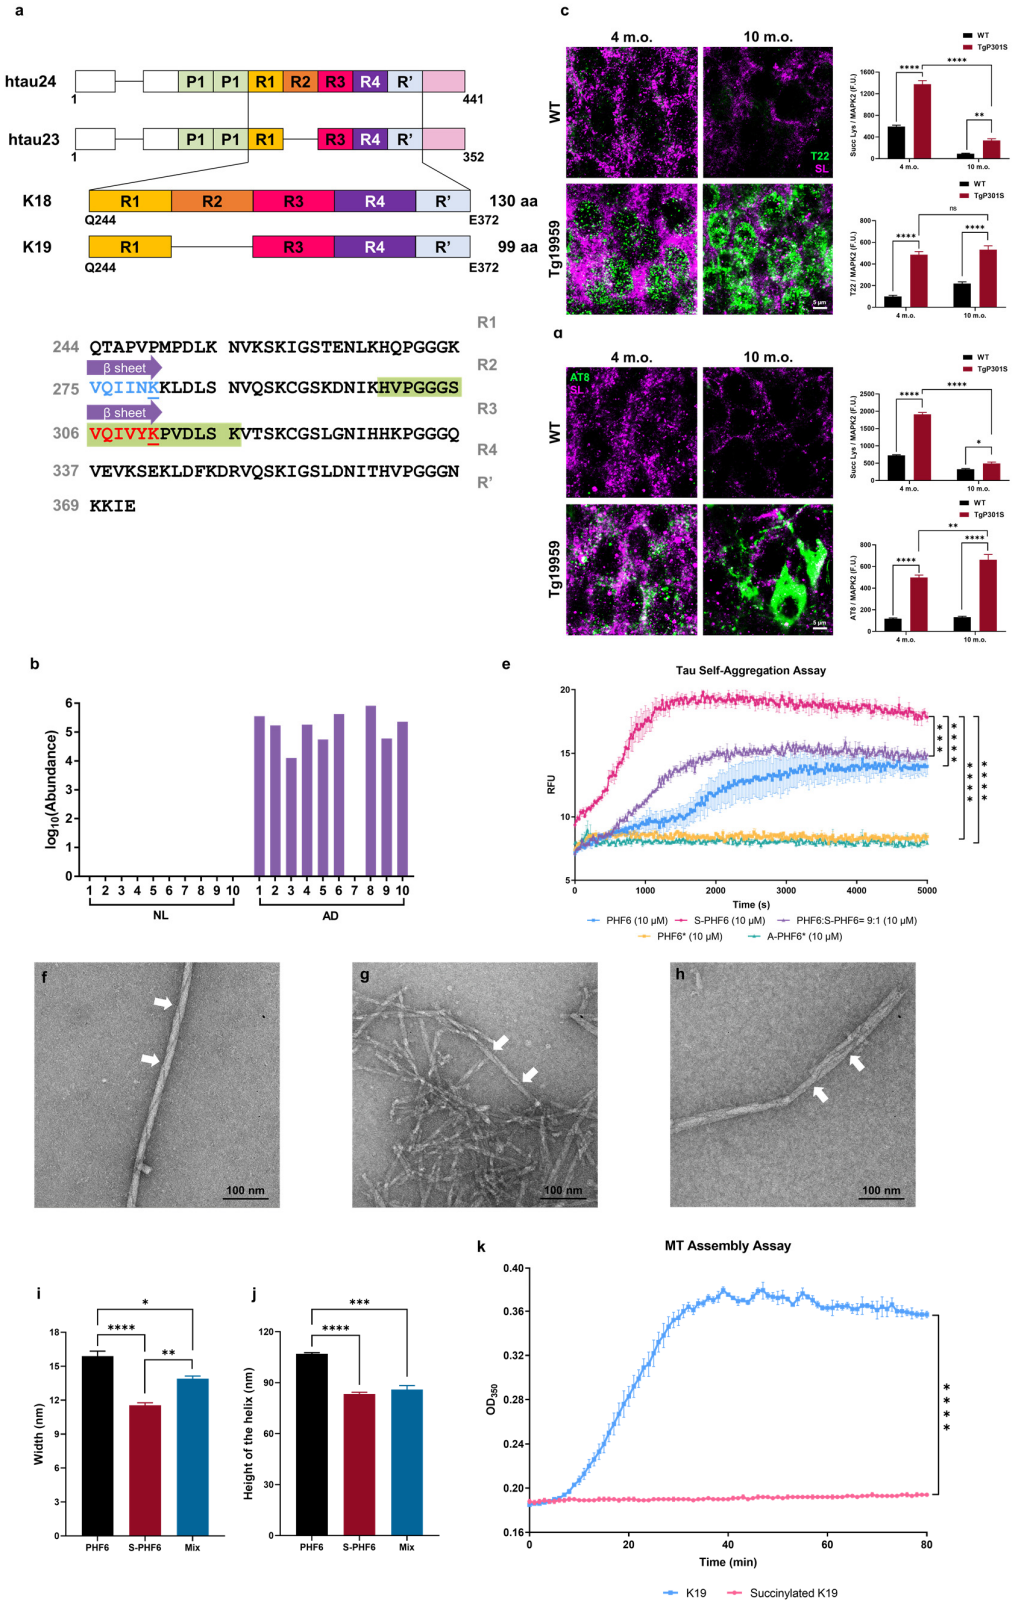

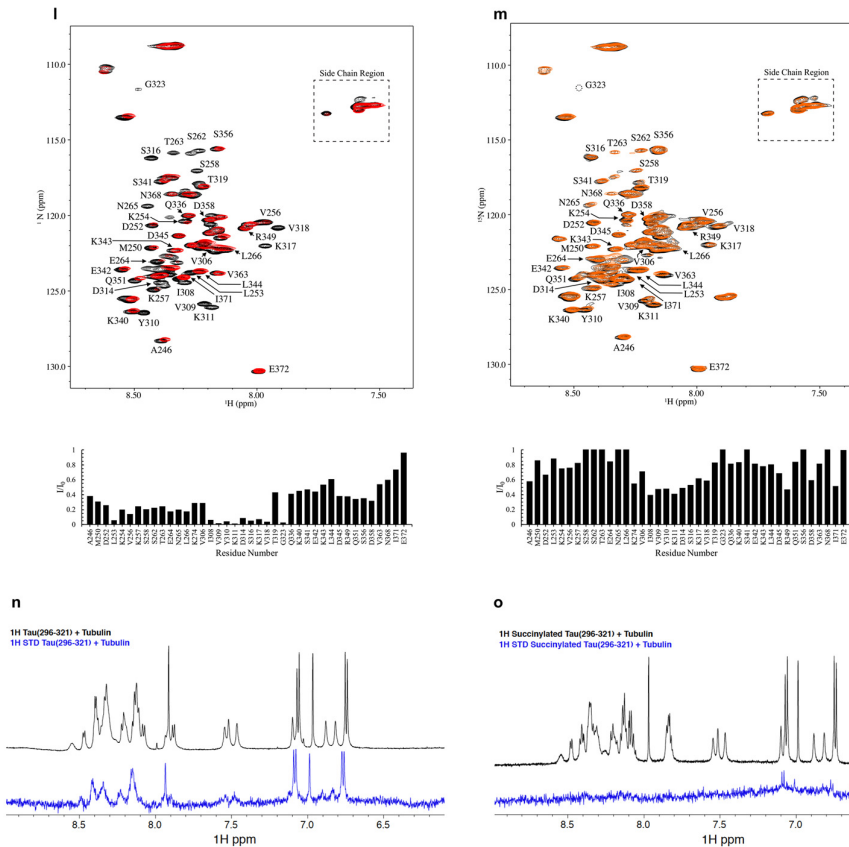

113

114 **Figure 6.** The unique succinylation of K311 on tau in brains from patients with AD promotes AD  
 115 like features in tau pathology.

116 **a.** Domain structure of tau and the location of succinylation K311. The diagram shows the domain  
 117 structure of htau23 and 24, which contain three and four repeats, respectively. The constructs K18  
 118 and K19 comprise four repeats and three repeats, respectively. Residues are numbered according  
 119 to tau441 sequence. Purple arrow represents the two central strands of the  $\beta$ -sheet (PHF6\*:

120 Val275-Lys280, highlighted in blue, the blue underlined lysine refers to acetylated K280; PHF6:  
 121 Val306-Lys311, highlighted in red, the red underlined lysine refers to succinylated K311). Green  
 122 highlights the peptide identified by MS.

123 **b.** Abundance of succinylation K311 found in brains from ten controls and ten patients with AD.  
 124 Data transformed by  $\log_{10}$  (abundance) for normalization purposes and to facilitate presentation.

125 **c.** High confocal microscope analysis results of the co-localization of succinylation and tau  
 126 oligomers in the hippocampal CA1 region sections from 4-month-old and 10-month-old TgP301S  
 127 or WT mice. T22 (green) staining tau oligomers; pan-succinyl-lysine (magenta). Four mice per

128 group. Data were expressed as the mean with SEM representative of the average of ~900-  
129 1000 MAP2 neurons or 60 A $\beta$  plaques comprised in 3-4 different hippocampal sections per  
130 animal. The fluorescence intensity of succinyl lysine was normalized to the number of pyramidal  
131 neurons (\*\*\*\*:  $p < 0.0001$ , \*\*:  $p < 0.01$ , two-way ANOVA followed by Tukey's multiple  
132 comparisons test).

133 **d.** High confocal microscope analysis results of the co-localization of succinylation and phospho-  
134 tangle pathology in the hippocampal CA1 region sections from 4-month-old and 10-month-old  
135 TgP301S or WT mice. AT8 (green) staining phospho-tau; pan-succinyl-lysine (magenta). Four  
136 mice per group. Data were expressed as the mean with SEM representative of the average of  
137 ~900-1,000 MAP2 neurons comprised in 3-4 different hippocampal sections per animal. The  
138 fluorescence intensity of succinyl lysine was normalized to the number of pyramidal neurons  
139 (\*\*\*\*:  $p < 0.0001$ , \*\*:  $p < 0.01$ , two-way ANOVA followed by Tukey's multiple comparisons  
140 test).

141 **e.** Succinylation promotes self-aggregation of tau. Tau peptides concentrations were 10  $\mu$ M in  
142 presence of 2.5  $\mu$ M heparin: PHF6 (■), S-PHF6 (●), PHF6:S-PHF6 = 9:1 (▲), PHF6\* (■), A-  
143 PHF6\* (▲). Experiments were performed in triplicate and repeated three times with similar  
144 results. All values in the present graph were expressed as mean  $\pm$  SEM. All statistical analysis was  
145 implemented at time = 5,000 s ( $n = 3$ ; \*\*\*\*:  $p < 0.0001$ , \*\*\*:  $p < 0.001$  in comparison to S-PHF6,  
146 one-way ANOVA followed by Tukey's multiple comparisons test).

147 **f-h.** Negative stain electron microscopy of *in vitro* polymerized PHFs after 24 hrs incubation. **f:** 50  
148  $\mu$ M PHF6; **g:** 50  $\mu$ M S-PHF6; **h:** 50  $\mu$ M mixture (PHF6:S-PHF6 = 9:1). White arrows denote  
149 paired helical filaments. Scale bar is 100 nm.

150 **i, j.** The width and height of the fiber helix found in polymerized PHFs after 24 hrs incubation *in*  
151 *vitro*. All photographed examples were measured in 3 cases, and the results averaged. Error bars  
152 represent SEM deviation from the mean ( $n = 3$ ; \*\*\*\*:  $p < 0.0001$ , \*\*\*:  $p < 0.001$ , \*\*:  $p < 0.01$ , \*:  
153  $p < 0.05$ , one-way ANOVA followed by Tukey's multiple comparisons test).

154 **k.** Inhibition of assembly reaction of K19 and microtubules by succinylation of K19.  
155 Incubations (30 minutes) were with 30  $\mu$ M succinylated K19 (●) or non-succinylated K19  
156 (■). All of the experiments were performed in triplicate and repeated three times with similar  
157 results. Error bars represent SEM deviation from the mean. All statistical analysis was

158 implemented at time = 80 min (n = 3; \*\*\*\*:  $p < 0.0001$ , one-way ANOVA followed by Tukey's  
159 multiple comparisons test).

160 **i, m.** Succinylation of K19 weakens its interactions with T2R.  $^1\text{H}$ ,  $^{15}\text{N}$  HSQC spectra were  
161 recorded for unmodified and succinylated K19 in the absence (black) and in the presence (red  
162 for unmodified K19, orange for succinylated K19) of T2R. **i:** Unmodified  $^{15}\text{N}$  K19 spectra  
163 (assignments for well-resolved residues as indicated) exhibit intensity loss for multiple  
164 residues including Ile<sup>308</sup>, Val<sup>309</sup>, Tyr<sup>310</sup>, Lys<sup>311</sup> in the presence of T2R. Attenuation of  
165 resonance intensities is observed for a range of K19 resonances in the presence of T2R, and is  
166 quantified as intensity ratios ( $I/I_0$ ). **m:** Succinylated  $^{15}\text{N}$  K19 spectra exhibit less intensity loss  
167 in the presence of T2R, with residues Ile<sup>308</sup>, Val<sup>309</sup>, Tyr<sup>310</sup>, Lys<sup>311</sup> remaining visible. Increased  
168 intensity ratios of succinylated K19 resonances in the presence of T2R compared to those for  
169 unmodified K19 indicate decreased binding upon succinylation.

170 **n, o:** Succinylation of K311 weakens the interactions of tau peptide (296-321) with tubulin. **n:**  
171 Comparison of 1D  $^1\text{H}$  spectra (black) and saturation transfer difference NMR spectra (blue) of  
172 unmodified tau peptide (296-321) in the presence of 20  $\mu\text{M}$  tubulin. **o:** Comparison of 1D  $^1\text{H}$  spectra  
173 (black) and saturation transfer difference spectra (blue) of K311-succinylated tau peptide (296-321)  
174 in the presence of 20  $\mu\text{M}$  tubulin. The tau peptide concentrations were ca. 1 mM. The signals  
175 observed in the STD spectrum of unmodified tau peptide demonstrate that it binds to tubulin. In  
176 contrast, no or weak binding was detected under these conditions for the K311 succinylated tau  
177 peptide.

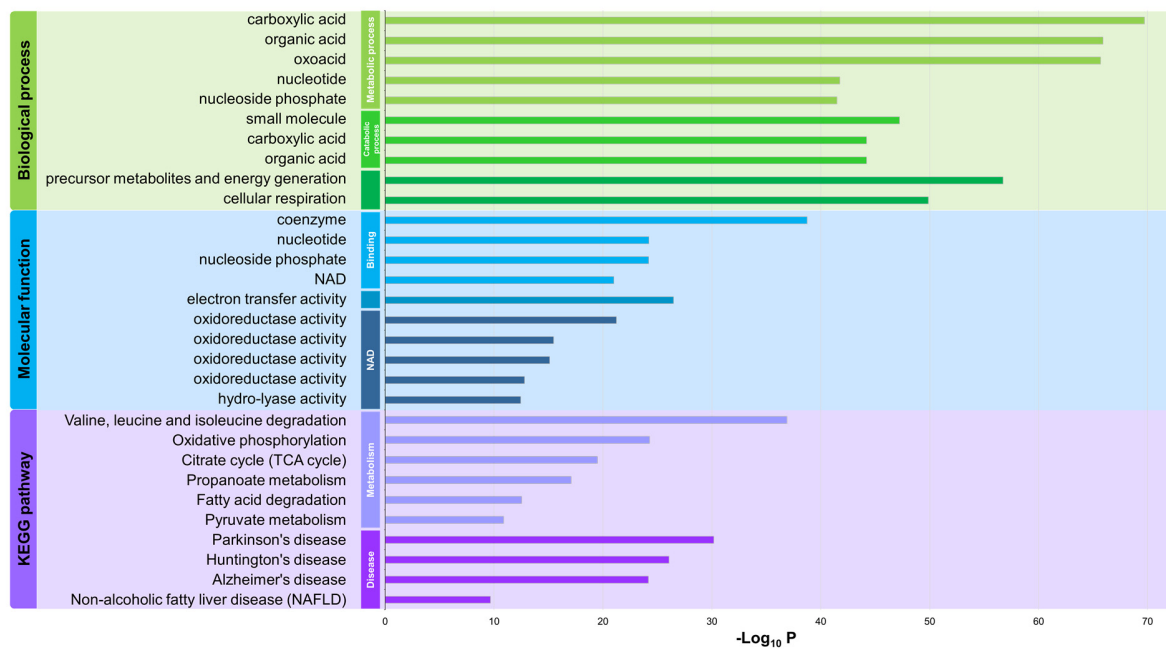

1  
2  
3  
4  
5  
6  
7

**Extended Data Figure 1.** Gene ontology functional analysis of human brain succinylome. The graph shows *p*-values (step-down Bonferroni correction) for the most significant specific terms reflecting biological process (green field), molecular function (blue field) and cell component (purple field) (**Supplementary Table 3** for detail).

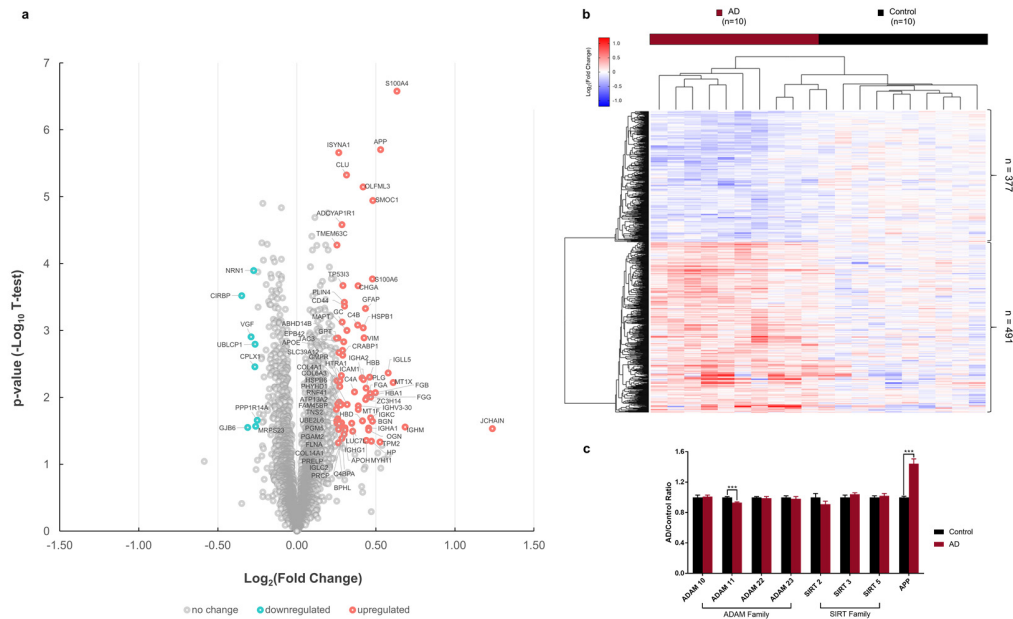

8

9 **Extended Data Figure 2.** Comparison of the brain global proteomics from ten controls and ten patients  
 10 with AD reveal many specific differences.

11 **a.** Volcano plot of global proteomic results comparing brains from controls and AD patients. The signal  
 12 detection result shows the magnitude (mean expression difference, x-axis) and significance ( $-\log_{10}$  p-  
 13 value, y-axis) for brain protein level changes associations of AD. Each spot represents a specific protein.  
 14 Green symbols indicate proteins that decline significantly while red symbols indicate proteins that are  
 15 elevated significantly in AD brains ( $p < 0.05$ , paired Student's t-test,  $|\log_2FC| > 0.25$ ).

16 **b.** Supervised hierarchical clustering of the 868 proteins whose levels differ ( $p < 0.05$ , two-sided Student's  
 17 t-test) between AD and control.

18 **c.** Proteomic analysis indicates that the protein levels of the  $\alpha$ -secretase (ADAM10) are not altered in AD.

19

20

21



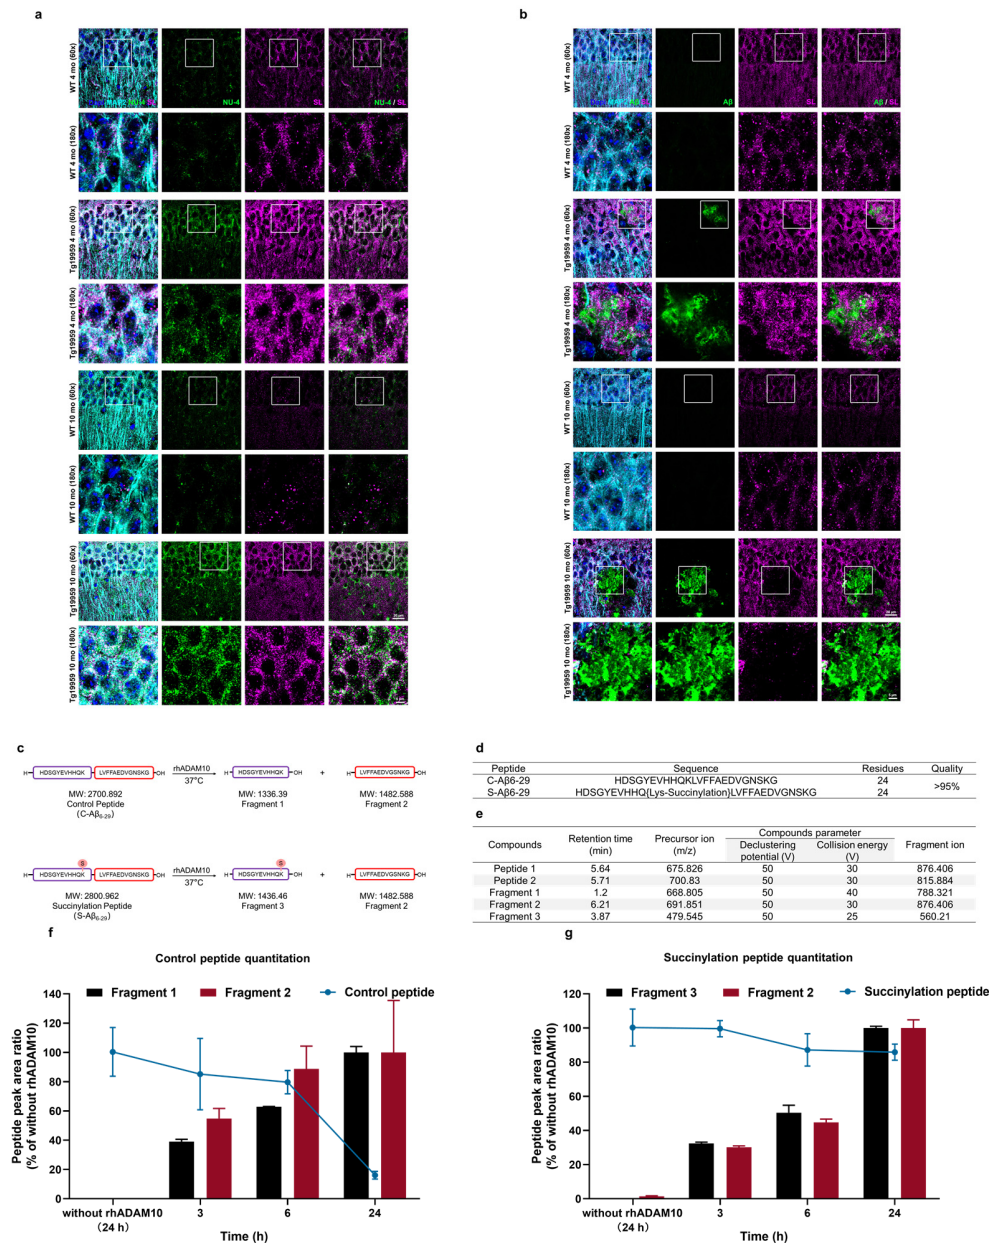

22

23 **Extended Data Figure 3.** Inhibition of succinylated K687 on Aβ<sub>6-29</sub> in the α-cleavage assay and  
 24 succinylate Aβ<sub>42</sub> using succinyl-CoA *in vitro* and its effect on ThT fluorescence assay.

25 **a.** High confocal microscope analysis results of the co-localization of succinylation and Aβ oligomers  
 26 pathology in the hippocampal CA1 region sections from 4-month-old and 10-month-old Tg19959 or WT  
 27 mice. NU-4 (green) staining Aβ oligomers; pan-succinyl-lysine (magenta); MAP2 (cyan); DAPI staining  
 28 nuclear (dark blue).

- 29 **b.** High confocal microscope analysis results of the co-localization of succinylation and plaque pathology  
30 in the hippocampal CA1 region sections from 4-month-old and 10-month-old Tg19959 or WT mice. A $\beta$   
31 (green) staining plaque; pan-succinyl-lysine (magenta); MAP2 (cyan); DAPi staining nuclear (dark blue).  
32 **c.** The schematic diagram of  $\alpha$ -cleavage assay.  
33 **d.** Properties of A $\beta_{6-29}$  peptides used in the  $\alpha$ -cleavage assay.  
34 **e.** Multiple Reaction Monitoring (MRM) parameters with their retention time of targeted peptides and  
35 their fragments.  
36 **f.** The control A $\beta_{42}$  peptide and fragments quantitation in the  $\alpha$ -cleavage assay. Peptide peak area ratio  
37 values were calculated and were shown relative to corresponding controls without rhADAM10. Each  
38 sample was run in triplicate. Data are expressed as the mean  $\pm$  SEM.  
39 **g.** The succinylated A $\beta_{42}$  peptide and fragments quantitation in the  $\alpha$ -cleavage assay. Peptide peak area  
40 ratio values were calculated and are shown relative to corresponding controls without rhADAM10. Each  
41 sample was run in triplicate (except for one sample from the group of succinylated peptide without  
42 rhADAM10, one sample from the group of Fragment 3 without rhADAM10, and one sample from  
43 Fragment 1 at 6 hrs were damaged) and data are means  $\pm$  SEM.  
44

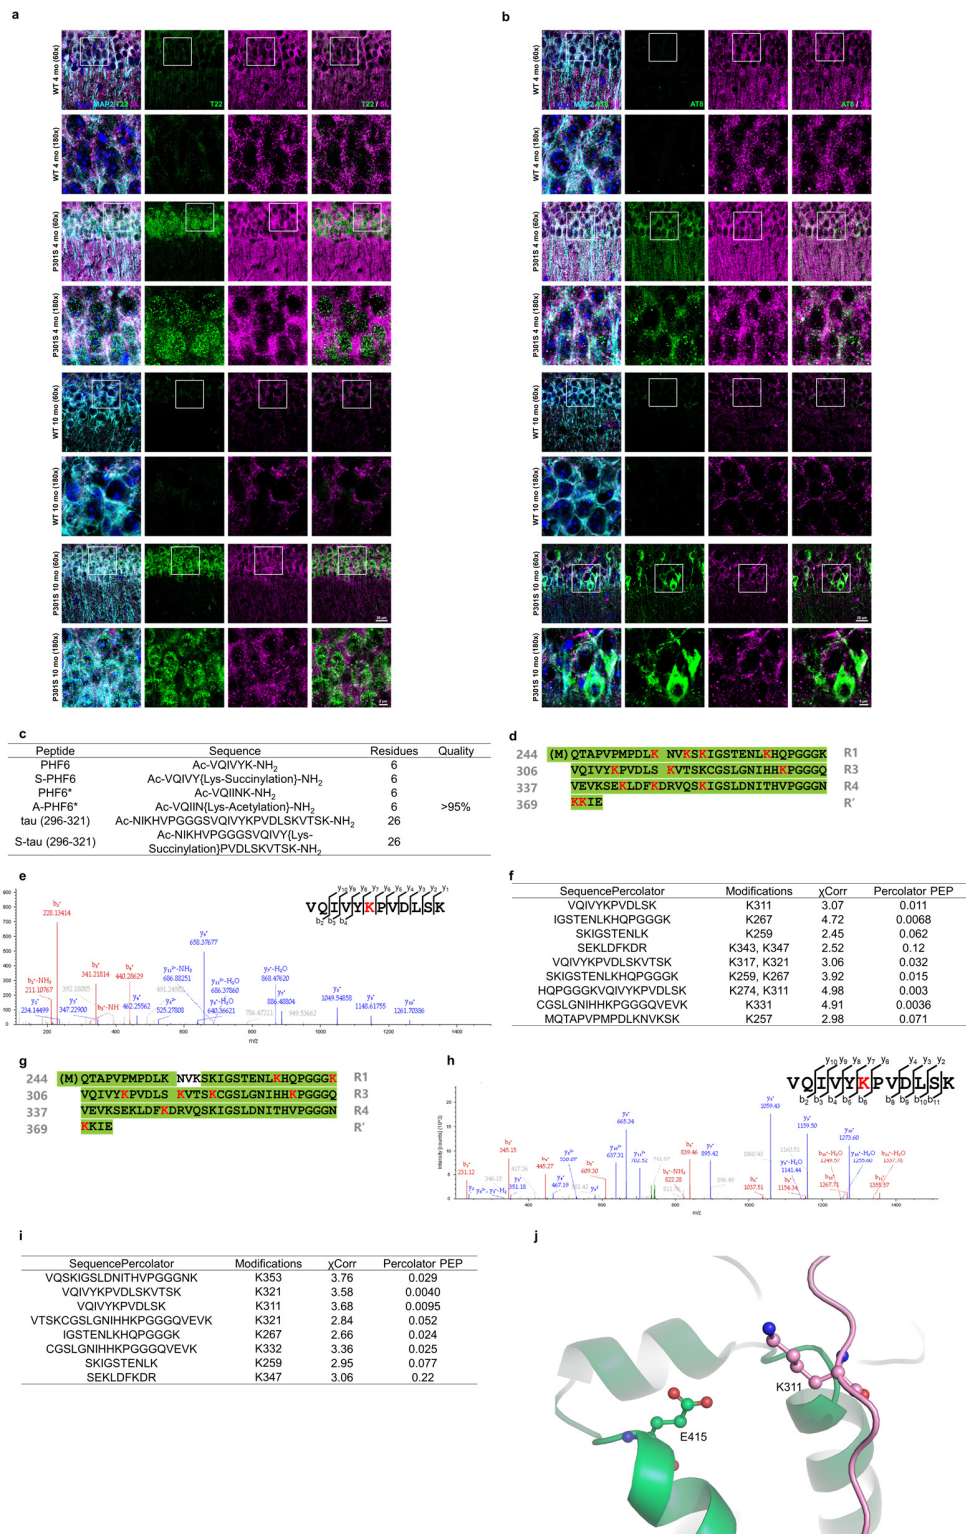

45

46 **Extended Data Figure 4.** Characterization of succinylate K19 and <sup>15</sup>N K19 using succinyl-CoA *in vitro*.

- 47 **a.** High confocal microscope analysis results of the co-localization of succinylation and tau oligomers  
48 pathology in the hippocampal CA1 region sections from 4-month-old and 10-month-old TgP301S or WT  
49 mice. T22 (green) staining tau oligomers; pan-succinyl-lysine (magenta); MAP2 (cyan); DAPI staining  
50 nuclear (dark blue).
- 51 **b.** High resolution confocal microscope analysis of the co-localization of succinylation and phospho-  
52 tangle pathology in the hippocampal CA1 region sections from 4-month-old and 10-month-old TgP301S  
53 or WT mice. AT8 (green) staining phospho-tau; pan-succinyl-lysine (magenta); MAP2 (cyan); DAPI  
54 staining nuclear (dark blue).
- 55 **c.** Properties of peptides used in the self-aggregation assay and STD NMR.
- 56 **d.** MS/MS identification of succ-lysines on K19 following succinylation with Succinyl-CoA *in vitro*.  
57 Residue numbering is based on the numbering of the longest tau isoform, htau40 (441 residues), and skips  
58 directly from residue 274 to 305 aa as a result of the absence of the second repeat (residues 275-305 aa).  
59 Formatting is used as follows: red, lysines (K) with succinyl group; green box, sequence covered by MS  
60 analysis.
- 61 **e.** Full MS and MS/MS spectra for identification and quantification of K311 succinylation on K19  
62 following succinylation *in vitro*. b and y ions indicate peptide backbone fragment ions containing the N  
63 and C terminal, respectively. <sup>2+</sup> indicates doubly charged ions. Succ-Lysine is colored in red.
- 64 **f.** K19 succinylation sites identified by MS ( $\chi_{\text{Corr}} \geq 2.11$ ).
- 65 **g.** MS/MS identification of succ-lysines on <sup>15</sup>N K19 following succinylation with Succinyl-CoA *in vitro*.  
66 Residue numbering is based on the numbering of the longest tau isoform, htau40 (441 residues), and skips  
67 directly from residue 274 to 305 aa as a result of the absence of the second repeat (residues 275-305 aa).  
68 Formatting is used as follows: red, lysines (K) with succinyl group; green box, sequence covered by MS  
69 analysis.
- 70 **h.** Full MS and MS/MS spectra for identification and quantification of K311 succinylation on <sup>15</sup>N K19  
71 following succinylation *in vitro*. b and y ions indicate peptide backbone fragment ions containing the N  
72 and C terminal, respectively. <sup>2+</sup> indicates doubly charged ions. Succ-Lysine is colored in red.
- 73 **i.** <sup>15</sup>N K19 succinylation sites identified by MS ( $\chi_{\text{Corr}} \geq 2.11$ ).
- 74 **j.** Three-dimensional structure of K311 on K19 and E415 on  $\alpha$ -tubulin during the tau-tubulin interactions.  
75
